# Supplementary material for: Charged N-terminus of Influenza Fusion Peptide Facilitates Membrane Fusion
Source: PubMed Central journal article supplement (PMC5855800; doi:10.3390/ijms19020578), 2018-02-14
Supplement: ijms-19-00578-s001.pdf [file ijms-19-00578-s001.pdf]

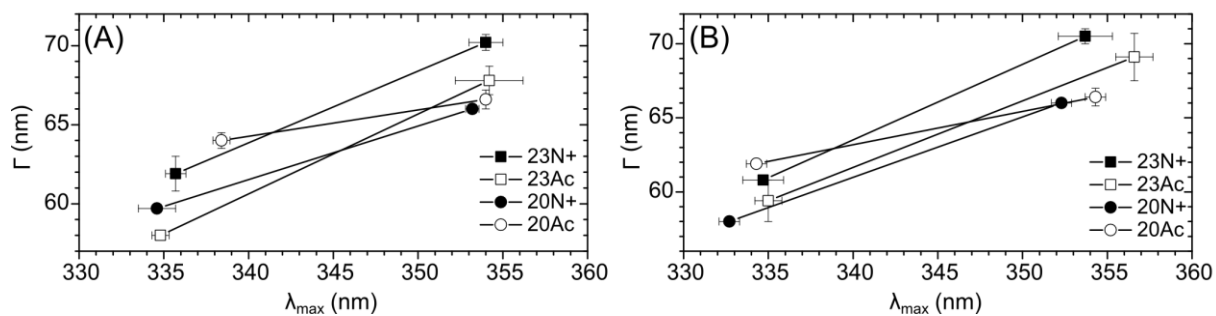

**Supplementary Figure 1.** Spectral changes: position of emission maximum ( $\lambda_{\max}$ ) vs. spectrum full width at half-maximum intensity ( $\Gamma$ ) of native tryptophan fluorescence for the initial and final titration point (change from right to left) at (A) pH 7.4, (B) pH 5.0.

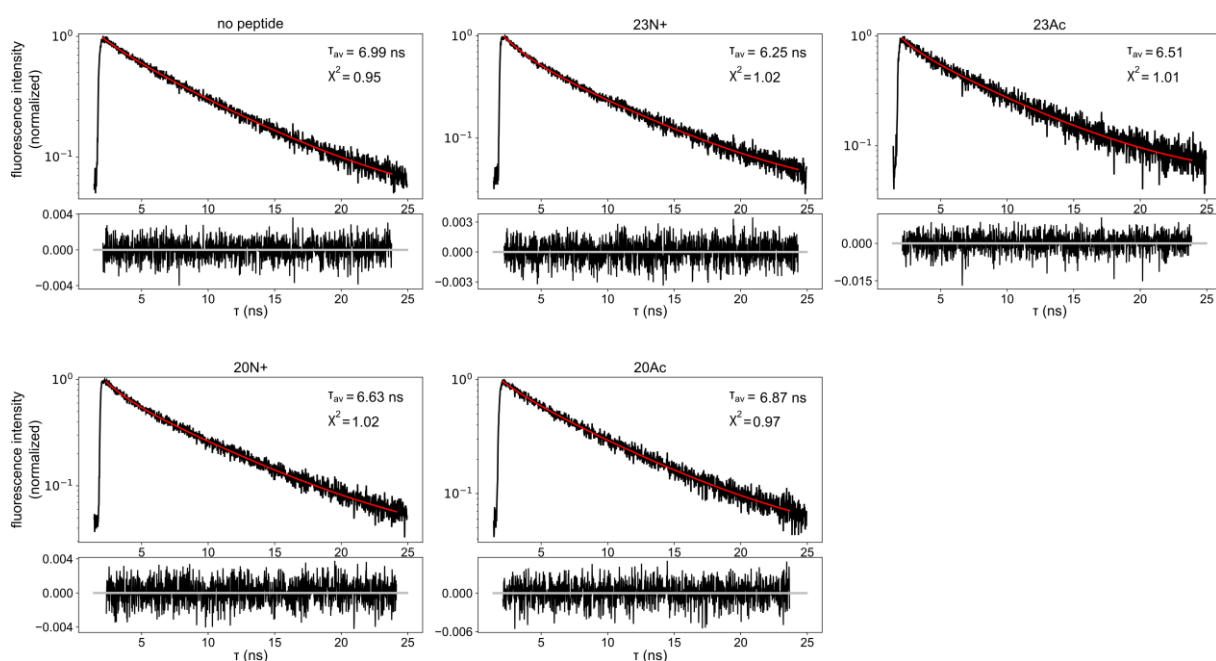

**Supplementary Figure 2** Fluorescence intensity decays with double-exponential fits for the GUV images in Figure 6C. Average lifetimes and  $\chi^2$  of fits are introduced in each panel.

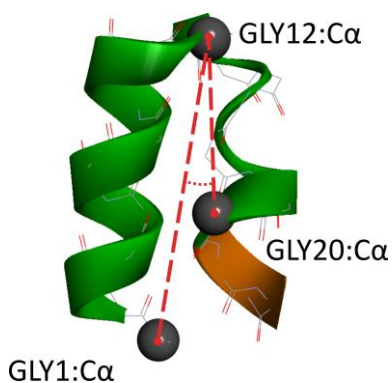

**Supplementary Figure 3** Hairpin opening angle definition: an angle between C alpha atoms of residues 1, 12, and 20.

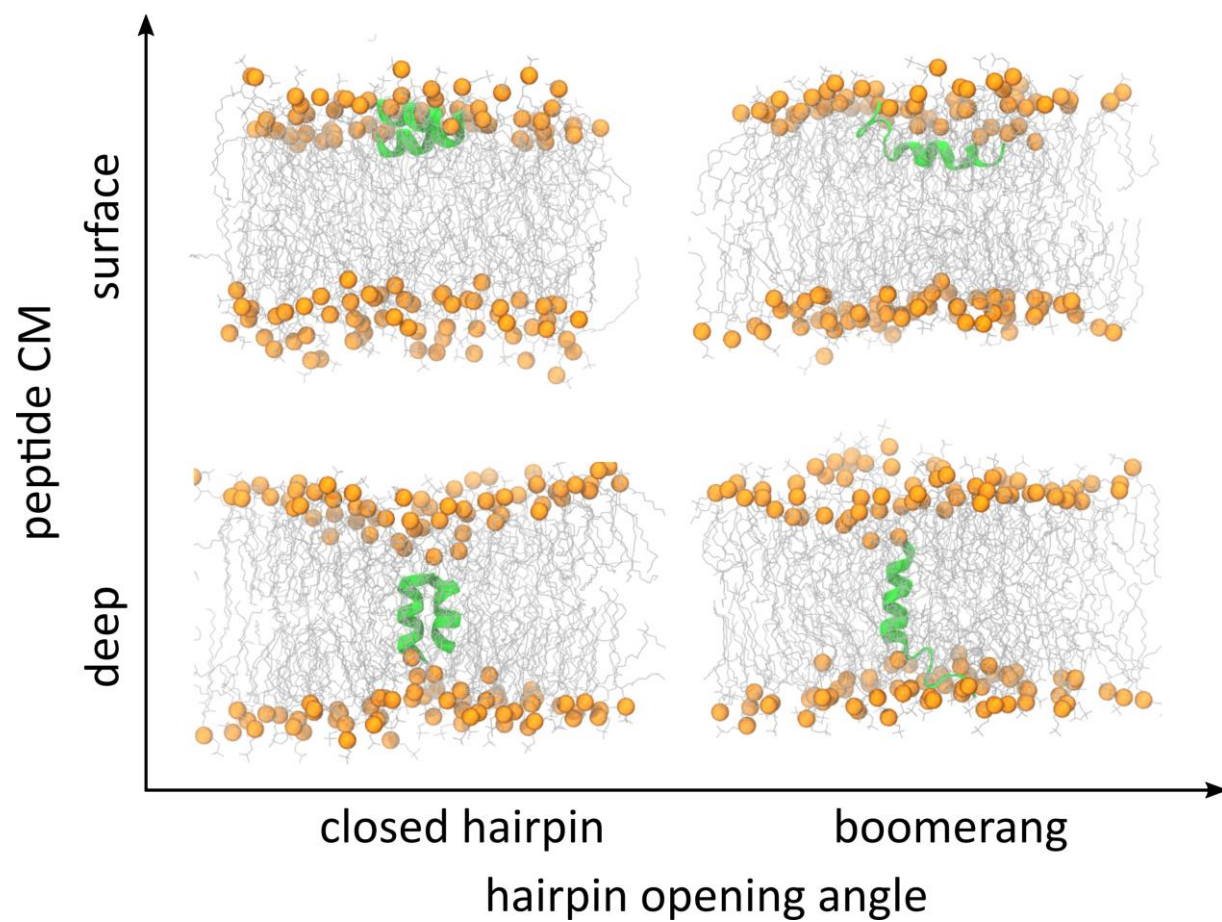

**Supplementary Figure 4** Snapshots of representative simulation frames for all free energy basins described in the main text.

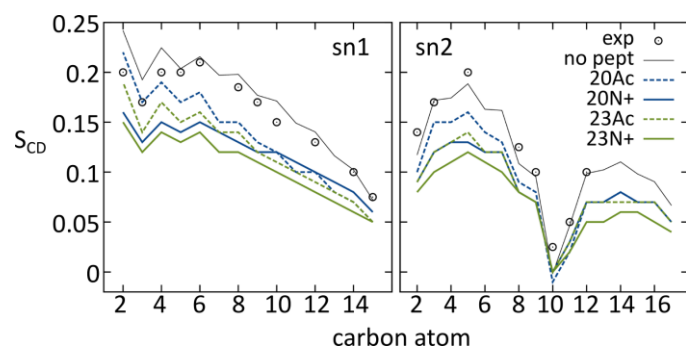

**Supplementary Figure 5** Absolute order parameter values ( $S_{CD}$ ) values in the vicinity of peptides for POPC *sn1* and *sn2* chains.
